# Supplementary material for: FAM83 family oncogenes are broadly involved in human cancers: an integrative multi‐omics approach
Source: PubMed Central journal article supplement (PMC5527452; doi:10.1002/1878-0261.12016), 2017-01-09
Supplement: MOL2-11-167-s001.pdf [file MOL2-11-167-s001.pdf]

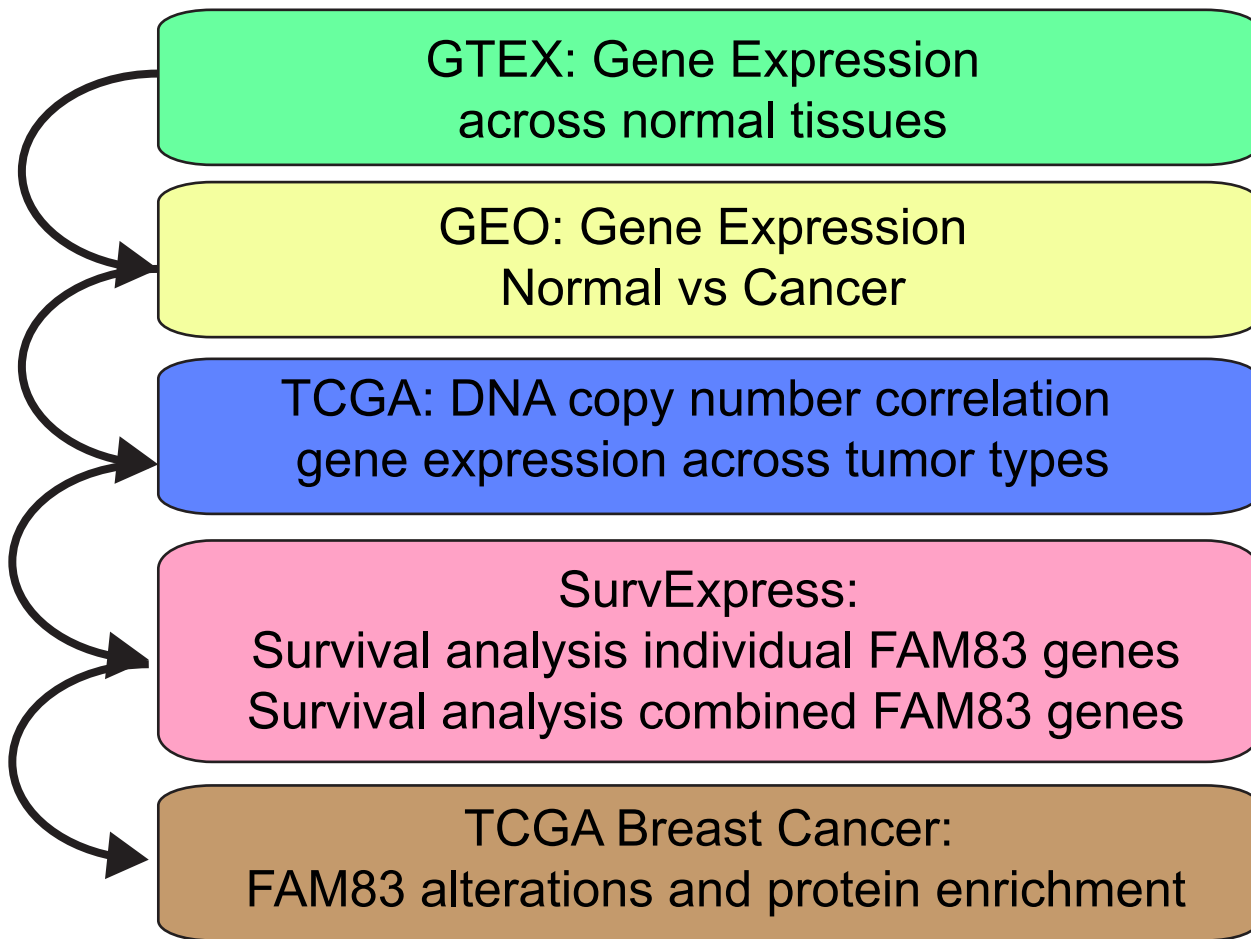

Figure S1. Multi-omic approach to investigate role of FAM83A-H in cancer
